# Supplementary material for: Occurrence of structural aluminium (Al) in marine diatom biological silica: visible evidence from microscopic analysis
Source: Copernicus journal article supplement (doi:10.5194/os-18-321-2022), 2022-03-17
Supplement: Supplementary file 1 [file os-18-321-2022-supplement.pdf]

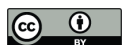

## *Supplement of*

# **Occurrence of structural aluminium (Al) in marine diatom biological silica: visible evidence from microscopic analysis**

**Qian Tian et al.**

*Correspondence to:* Dong Liu (liudong@gig.ac.cn)

The copyright of individual parts of the supplement might differ from the article licence.

**Table S1. Artificial seawater components and concentrations**

| Components                            | Concentration (g/L) |
|---------------------------------------|---------------------|
| NaCl                                  | 20.758              |
| Na <sub>2</sub> SO <sub>4</sub>       | 3.477               |
| KCl                                   | 0.587               |
| NaHCO <sub>3</sub>                    | 0.170               |
| KBr                                   | 0.0845              |
| H <sub>3</sub> BO <sub>3</sub>        | 0.0225              |
| NaF                                   | 0.0027              |
| MgCl <sub>2</sub> · 6H <sub>2</sub> O | 9.395               |
| CaCl <sub>2</sub> · 2H <sub>2</sub> O | 1.316               |
| SrCl <sub>2</sub> · 6H <sub>2</sub> O | 0.0214              |

**Table S2. F/2 Medium components and their concentrations in the artificial seawater**

| Components                                          | Molar concentration in final medium |
|-----------------------------------------------------|-------------------------------------|
| NaNO <sub>3</sub>                                   | $8.82 \times 10^{-4}$ M             |
| NaH <sub>2</sub> PO <sub>4</sub> ·H <sub>2</sub> O  | $3.62 \times 10^{-5}$ M             |
| Na <sub>2</sub> SiO <sub>3</sub> ·9H <sub>2</sub> O | $1.06 \times 10^{-4}$ M             |
| FeCl <sub>3</sub> ·6H <sub>2</sub> O                | $1.17 \times 10^{-5}$ M             |
| Na <sub>2</sub> EDTA·2H <sub>2</sub> O              | $1.17 \times 10^{-5}$ M             |
| CuSO <sub>4</sub> ·5H <sub>2</sub> O                | $3.93 \times 10^{-8}$ M             |
| Na <sub>2</sub> MoO <sub>4</sub> ·2H <sub>2</sub> O | $2.60 \times 10^{-8}$ M             |
| ZnSO <sub>4</sub> ·7H <sub>2</sub> O                | $7.65 \times 10^{-8}$ M             |
| CoCl <sub>2</sub> ·6H <sub>2</sub> O                | $4.20 \times 10^{-8}$ M             |
| MnCl <sub>2</sub> ·4H <sub>2</sub> O                | $9.10 \times 10^{-7}$ M             |
| Thiamine HCl (Vit B1)                               | $2.96 \times 10^{-7}$ M             |
| Biotin (Vit H)                                      | $2.05 \times 10^{-9}$ M             |
| Cyanocobalamin (Vit B <sub>12</sub> )               | $3.69 \times 10^{-10}$ M            |

**Fig. S1**

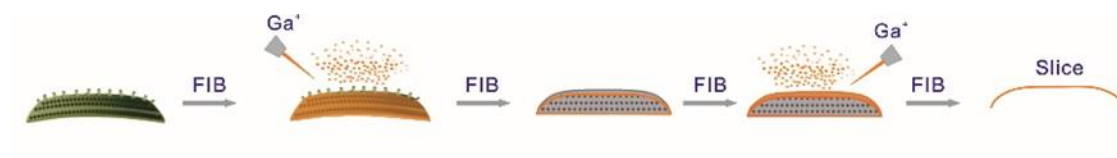

Fig. S1 Schematic representation of FIB-milling processes on the BSi particle

**Fig. S2**

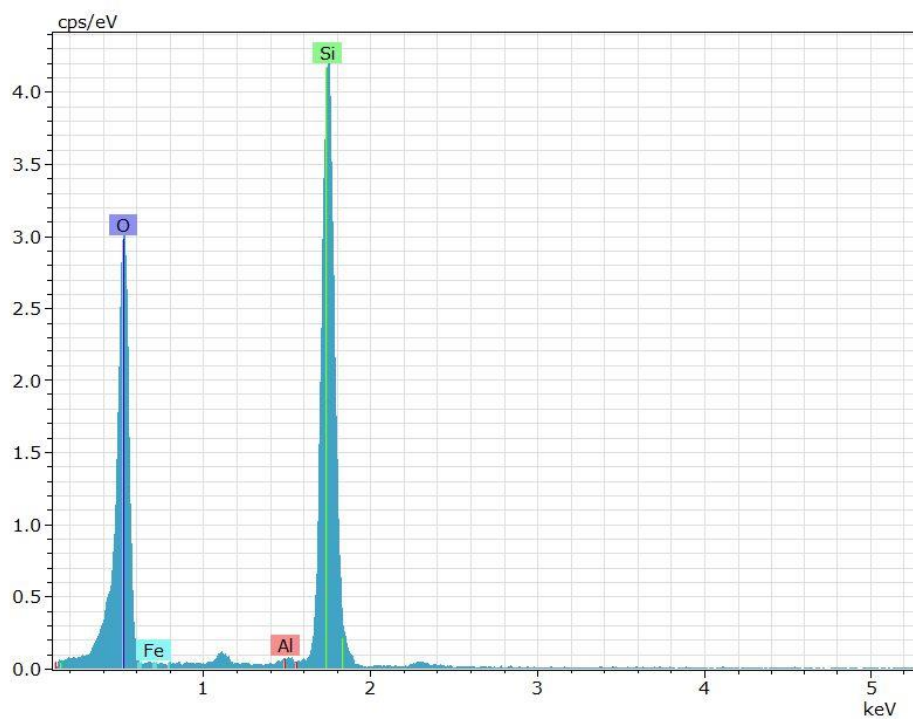

Fig. S2 EDS spectra data from FIB-EDS-mapping

**Fig. S3**

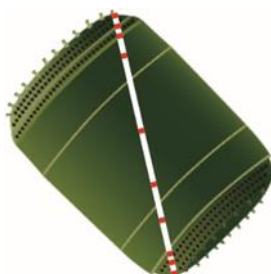

Fig. S3. Schematic representation of the selection of EDS spots (red spots are the positions of EDS)
